# Supplementary material
Source: PubMed Central journal article supplement (PMC1755268)
Supplement: annrheumd_ard.2004.031666_1.pdf [file annrheumd_ard.2004.031666_1.pdf]

**Table W1 Proportion of smokers (%) for different occupational and educational groups**

| <b>Women</b>                           |                 |                      |                        |                   |                            |
|----------------------------------------|-----------------|----------------------|------------------------|-------------------|----------------------------|
|                                        |                 | <b>Never smokers</b> | <b>Current smokers</b> | <b>Ex smokers</b> | <b>Non regular smokers</b> |
| <b>No university degree</b>            | <b>Cases</b>    | 30                   | 33                     | 28                | 9                          |
|                                        | <b>Controls</b> | 39                   | 28                     | 21                | 11                         |
| <b>University degree</b>               | <b>Cases</b>    | 48                   | 15                     | 26                | 11                         |
|                                        | <b>Controls</b> | 39                   | 14                     | 33                | 14                         |
| <b>Not higher non-manual employees</b> | <b>Cases</b>    | 32                   | 28                     | 29                | 10                         |
|                                        | <b>Controls</b> | 36                   | 25                     | 26                | 12                         |
| <b>Higher employees</b>                | <b>Cases</b>    | 43                   | 20                     | 23                | 13                         |
|                                        | <b>Controls</b> | 42                   | 18                     | 25                | 14                         |

| <b>Men</b>                             |                 |                      |                        |                   |                            |
|----------------------------------------|-----------------|----------------------|------------------------|-------------------|----------------------------|
|                                        |                 | <b>Never smokers</b> | <b>Current smokers</b> | <b>Ex smokers</b> | <b>Non regular smokers</b> |
| <b>No university degree</b>            | <b>Cases</b>    | 21                   | 33                     | 40                | 6                          |
|                                        | <b>Controls</b> | 25                   | 27                     | 37                | 10                         |
| <b>University degree</b>               | <b>Cases</b>    | 26                   | 21                     | 41                | 12                         |
|                                        | <b>Controls</b> | 43                   | 11                     | 39                | 8                          |
| <b>Not higher non-manual employees</b> | <b>Cases</b>    | 23                   | 29                     | 43                | 5                          |
|                                        | <b>Controls</b> | 28                   | 24                     | 40                | 9                          |
| <b>Higher employees</b>                | <b>Cases</b>    | 24                   | 30                     | 41                | 6                          |
|                                        | <b>Controls</b> | 36                   | 12                     | 40                | 12                         |

| <b>All</b>                             |                 |                      |                        |                   |                            |
|----------------------------------------|-----------------|----------------------|------------------------|-------------------|----------------------------|
|                                        |                 | <b>Never smokers</b> | <b>Current smokers</b> | <b>Ex smokers</b> | <b>Non regular smokers</b> |
| <b>No university degree</b>            | <b>Cases</b>    | 27                   | 33                     | 32                | 8                          |
|                                        | <b>Controls</b> | 35                   | 28                     | 26                | 11                         |
| <b>University degree</b>               | <b>Cases</b>    | 44                   | 16                     | 29                | 11                         |
|                                        | <b>Controls</b> | 40                   | 13                     | 35                | 13                         |
| <b>Not higher non-manual employees</b> | <b>Cases</b>    | 30                   | 29                     | 33                | 9                          |
|                                        | <b>Controls</b> | 34                   | 25                     | 30                | 11                         |
| <b>Higher employees</b>                | <b>Cases</b>    | 35                   | 24                     | 31                | 10                         |
|                                        | <b>Controls</b> | 40                   | 16                     | 31                | 13                         |
